# Supplementary material
Source: PubMed Central journal article supplement (PMC3967859)
Supplement: NIHMS532588-supplement-1_si_001.pdf [file NIHMS532588-supplement-1_si_001.pdf]

## Supporting Information Available

# Highlighting the Role of Polymer Length, Carbohydrate size, and Nucleic Acid Type in Potency of Glycopolycation Agents for pDNA and siRNA Delivery

Lian Xue, Nilesh P. Ingle and Theresa M. Reineke\*

Department of Chemistry, University of Minnesota, 207 Pleasant Street SE, Minneapolis,  
MN, 55455.

\*Correspondence should be addressed to: Dr. Theresa M. Reineke, Department of  
Chemistry, University of Minnesota Twin Cities, Minneapolis, MN. Phone: 612-624-8042.  
Email: treineke@umn.edu

## Contents

|                                     |   |
|-------------------------------------|---|
| SI Results and Discussion.....      | 2 |
| Gel Binding Assay .....             | 2 |
| NMR Measurements .....              | 2 |
| Size Exclusion Chromatography ..... | 4 |
| Dynamic Light Scattering.....       | 5 |
| MTT Assay.....                      | 6 |
| Zeta Potential Measurement .....    | 7 |

## SI Results and Discussion

### Gel Binding Assay

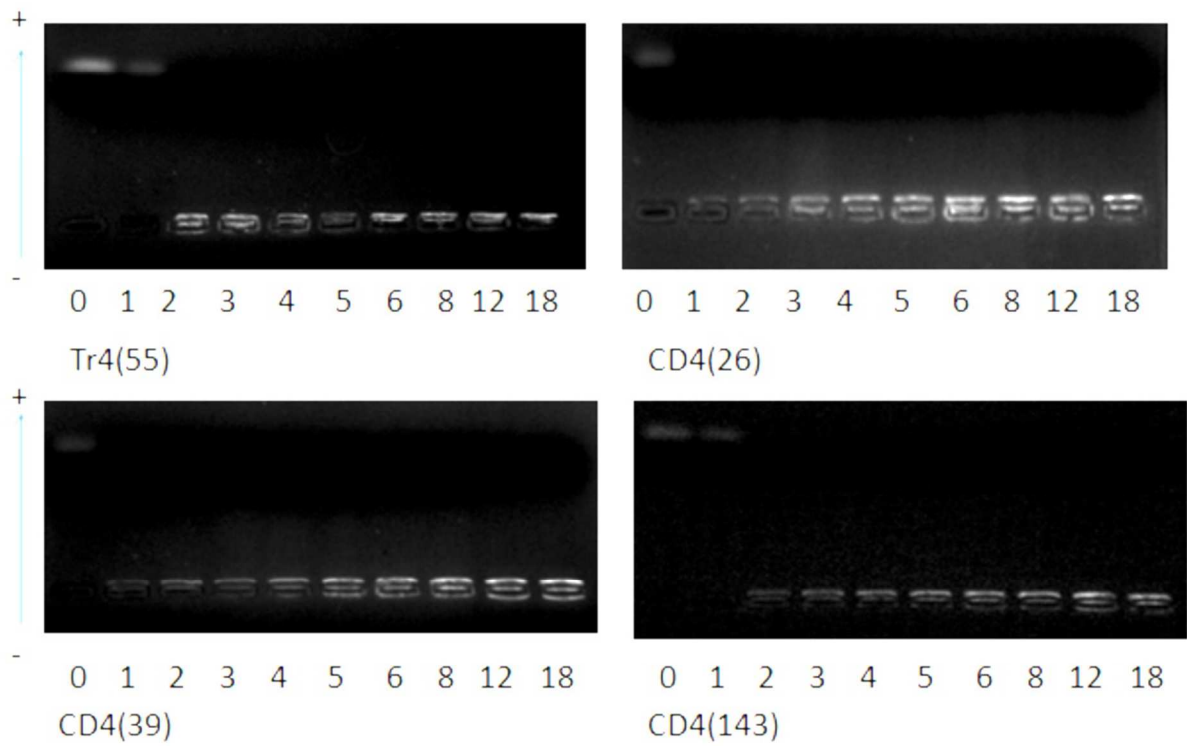

**Figure S1: The binding efficiency of polymers with siRNA examined by agarose gel electrophoresis. Photographs of gels for T4(55), CD4(26), CD4(39) and CD4(143) at N/P ratios: 1, 2, 3, 4, 5, 6, 8, 12 and 18.**

### NMR Measurements

$^1\text{H}$  NMR measurements were performed with a temperature-controlled Varian 400-MR spectrometer operating at a frequency of 399.7 MHz. Samples were prepared in  $\text{D}_2\text{O}$  (HOD internal standard).

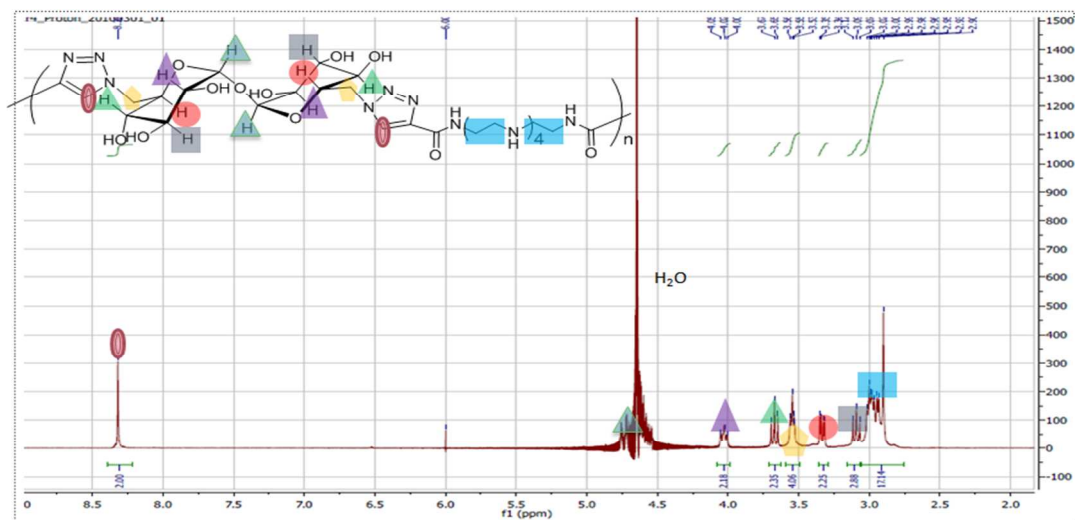

**Figure S2:  $^1\text{H}$ -NMR of Tr4(77).  $\delta$  2.90-3.05 m 17H, 3.05-3.12 t 2H, 3.30-3.35 dd 2H, 3.50-3.52 d 4H, 4.00-4.02 t 2H, 8.28 s 2H. The corresponding peaks were assigned according to  $^1\text{H}^1\text{H}$ -COSY.**

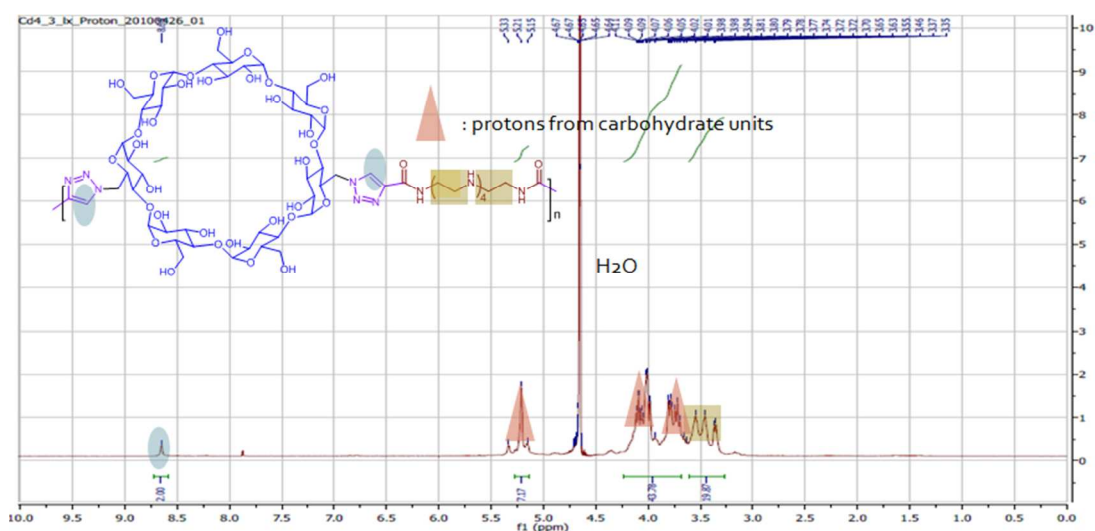

**Figure S3:  $^1\text{H}$ -NMR of CD4(26).  $\delta$  3.30-3.60 m 20H, 3.65-4.11 m 42H, 5.15-5.33 d 7H, 8.60 s 2H.**

## Size Exclusion Chromatography

Size exclusion chromatography (SEC) was applied to determine the number-average molecular weight ( $M_n$ ) and polydispersity indices (PDIs) for trehalose polymers and cyclodextrin polymers. The mobile phase for trehalose polymer is a solution of 0.5% sodium acetate (pH=5.5 with acetic acid) containing 20% acetonitrile. The mobile phase for cyclodextrin polymers is a solution of water: methanol: acetic acid (70:25:5).

A flow rate of 0.3 mL/min in the column (Eprogen Inc., IL), on a Wyatt HELEOS II (Santa Barbara, CA) light scattering detector ( $\lambda = 662$  nm), and an Optilab rEX refractometer ( $\lambda = 658$  nm) were used. The  $M_n$ , PDI, and  $dn/dc$  of the polymers were determined by Astra V (version 6.0, Wyatt Technologies).

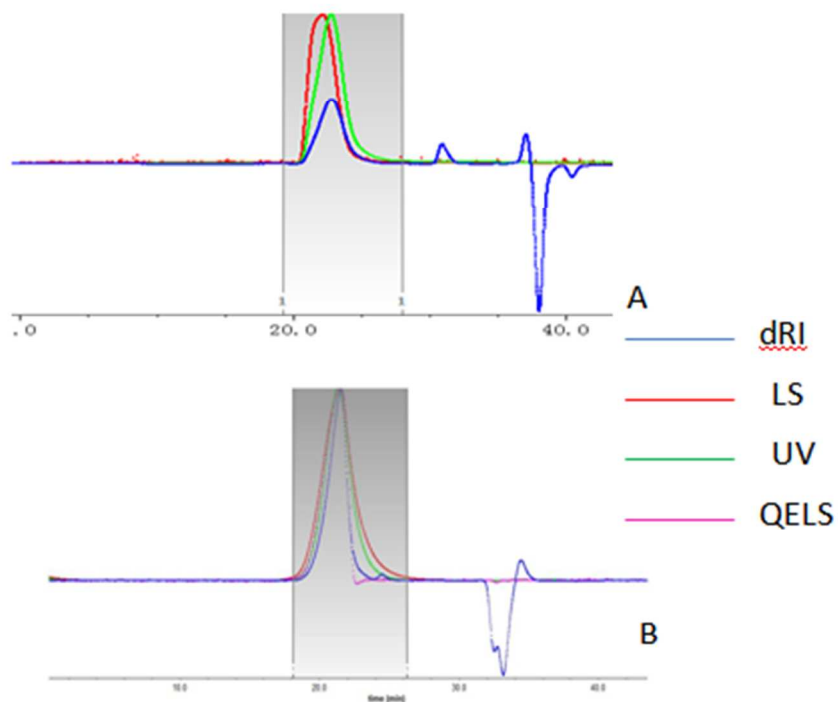

**Figure S4: SEC trace for trehalose polymer Tr4(77) (A) and cyclodextrin polymer CD4(26) (B).**

## Dynamic Light Scattering

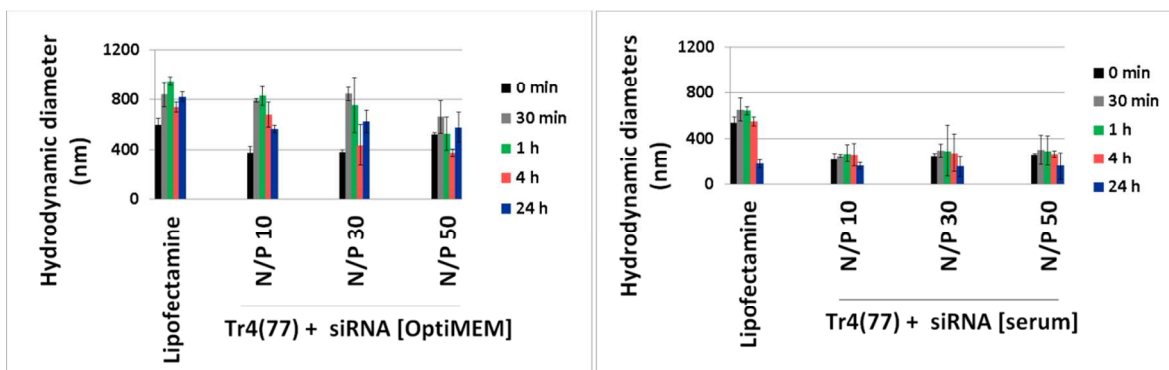

**Figure S5: Stability of polyplexes in two kinds of transfection media as measured by dynamic light scattering. Both (A) reduced-serum Opti-MEM and (B) complete DMEM (with 10% FBS) were applied to polyplexes as transfection media, and particle size was measured at indicated time points through 24 h at room temperature. Tr4(77) was the polymer used in this study with three N/P ratios (10, 30, and 50) tested.**

To study the stability of the polyplexes in reduced-serum and serum-containing transfection media, Tr4(77)-siRNA polyplex sizes were examined in both transfection media at selected timepoints up to 24 h at room temperature (**Error! Reference source not found.**). In Opti-MEM, the polyplexes were relatively large (~400-800 nm) and measurement results fluctuated significantly; however, most measured sizes were larger for all subsequent timepoints than they were for t=0 (this was true for Lipofectamine and for Tr4(77) at N/P=10 and N/P=30; only Tr4(77) at N/P=50 showed no apparent trend in size change over time). In serum-containing DMEM, particles formed with Lipofectamine decreased in size significantly (from ~600 nm to ~200 nm) at 24 h versus

all prior timepoints. It is also should be noted that, in contrast to the particles formed with Lipofectamine, the size of polyplexes formed using Tr4(77) differs significantly between Opti-MEM (~400-800 nm) and complete DMEM (~150-300 nm). In addition, the relative amount of Tr4(77) in the formulation (N/P=10, 30, or 50) did not influence the size of nanoparticles in either transfection medium.

### MTT Assay

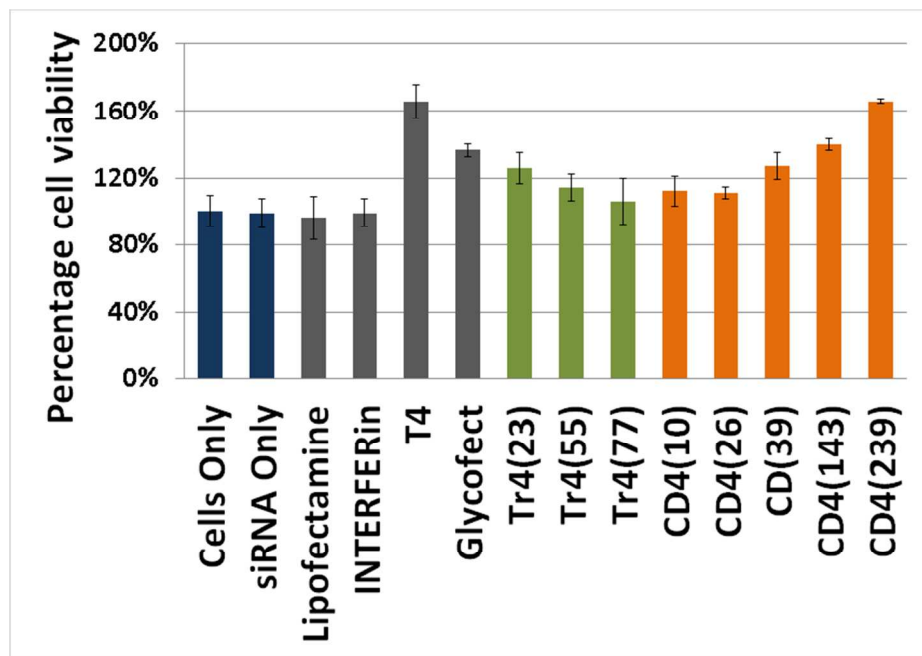

**Figure S6: MTT assay to measure the cytotoxicity of siRNA-containing complexes in U87-luc2 glioblastoma cells 24 h after transfection at N/P=50 and a siRNA concentration of 100 nM. All the experiments were performed in triplicate. The y-axis label “Percentage cell viability” stands for the relative activity of mitochondria reductase compared with those without treatment.**

## Zeta Potential Measurement

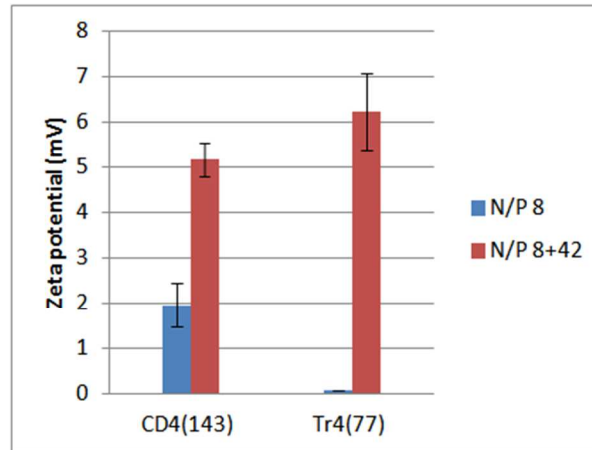

**Figure S7:** Measurement of zeta potential for polyplexes formed by CD4(143) and Tr4(77) with siRNA before and after addition of free polymers. The polyplexes were formed at N/P=8 in water at the siRNA concentration 1  $\mu$ M. After 1 hr incubation, the polyplexes then were diluted to 700  $\mu$ L with OptiMEM to yield the transfection solution. For the treatment of adding free polymers, the solution containing the same amount of N/P=42 polymer was added into the transfection solution for examination. All the experiments were performed in triplicate.
